# Supplementary material
Source: Frontiers journal article supplement (https://www.frontiersin.org/articles/491827)
Supplement: Data_Sheet_1.PDF [file Data_Sheet_1.PDF]

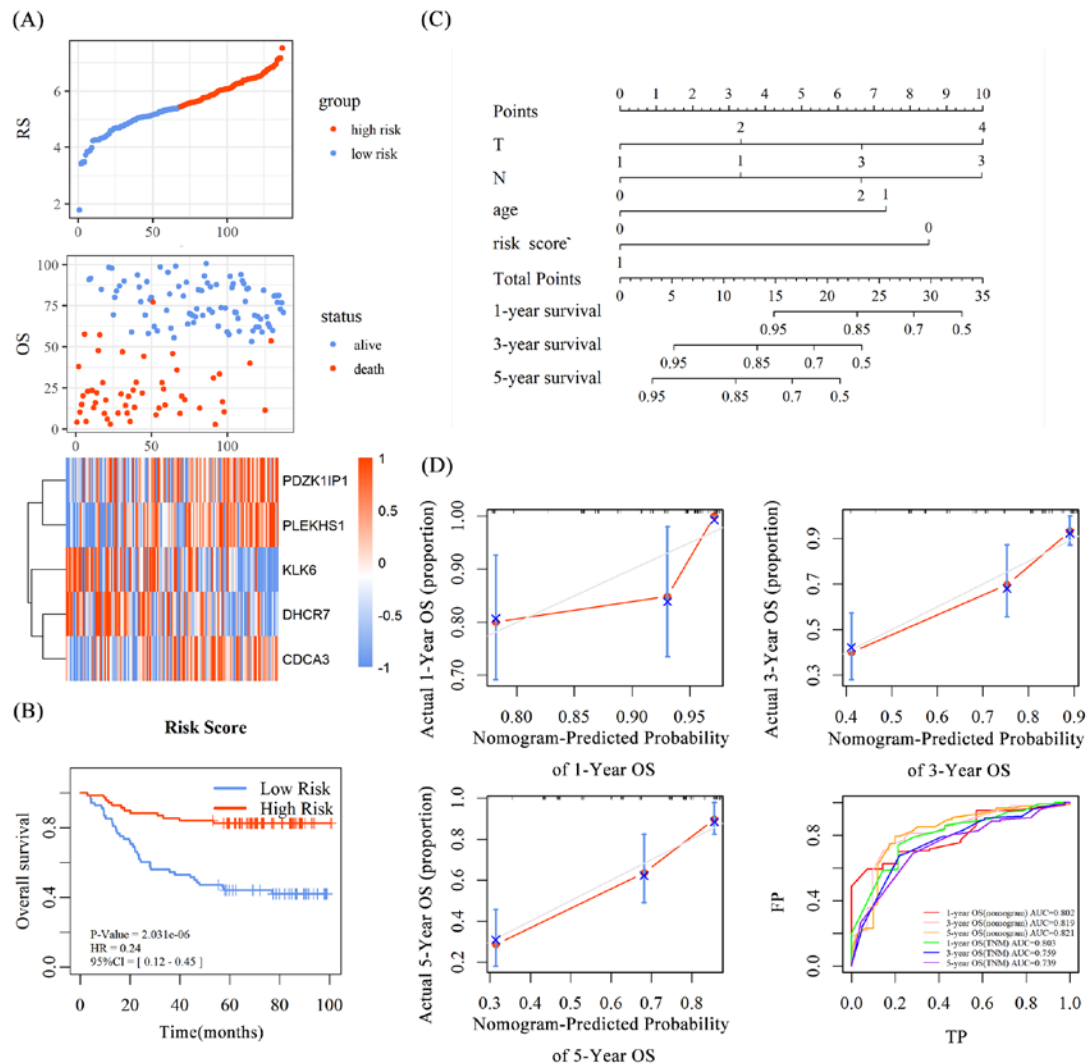

**Supplementary Figure 1.** The association between RS and OS, survival status and the expression of genes in the 5-gene signature was shown in scatter and heatmap plot (A). Kaplan–Meier was used to estimate the OS probability based on the RS in intestinal type GC. (B). The nomogram was established with the RS, age, T-stage and N-stage in diffuse type GC (C). The comparison between predicted and actual outcome for 1-, 3- and 5-year survival probabilities in the nomogram was showed in the Calibration plots.

Receiver operating characteristic (ROC) curves was used to compare the predictive ability of nomogram model and TNM stage for 1-, 3- and 5-year survival probabilities (D).
