# Supplementary material
Source: Frontiers journal article supplement (https://www.frontiersin.org/articles/491827)
Supplement: Data_Sheet_2.PDF [file Data_Sheet_2.PDF]

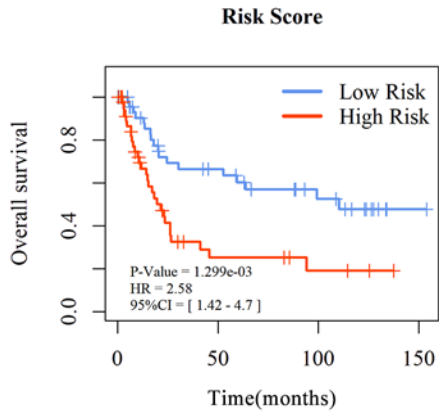

**Supplementary Figure 2.** KM analysis of the RS for OS in intestinal type GC in GSE15459 was based on Log-rank test.
